# Supplementary material for: Near-infrared multiphoton absorption and third harmonic generation with CsPbBr3 quantum dots embedded in micro-particles of metal–organic frameworks
Source: Royal Society of Chemistry journal article supplement (doi:10.1039/d3tc00306j), 2023-01-01
Supplement: d3tc00306j1.pdf [file d3tc00306j1.pdf]

Electronic Supplementary Information (ESI)

**Near-infrared multiphoton absorption and third harmonic generation with CsPbBr<sub>3</sub> quantum dots embedded in micro-particles of metal-organic frameworks**

*Qingxin Fan<sup>#a</sup>, Zhe Yan<sup>#b</sup>, Hao Zhou<sup>a</sup>, Yige Yao<sup>c</sup>, Zhenkun Wang<sup>b</sup>, Yunan Gao<sup>c</sup>, Yilin Wang<sup>a</sup>,  
Shunbin Lu<sup>\*b</sup>, Min Liu<sup>\*a</sup> and Wei Ji<sup>b,d</sup>*

<sup>a</sup>School of Microelectronics, Shandong Technology Center of Nanodevices and Integration, Shandong University, Jinan 250100, China.

<sup>b</sup>International Collaborative Laboratory of 2D Materials for Optoelectronic Science & Technology of Ministry of Education, Institute of Microscale Optoelectronics (IMO), Shenzhen University, Shenzhen 518060, China.

<sup>c</sup>State Key Laboratory for Artificial Microstructure and Mesoscopic Physics, School of Physics, Peking University, Beijing 100871, China

<sup>d</sup>Department of Physics, National University of Singapore, Singapore 117551, Singapore

E-mail: liumin@sdu.edu.cn, shunbin\_lu@szu.edu.cn

## 1. Experiment

### 1.1 materials synthesis

All chemicals were purchased from commercial corporation and used without further purification. Methanol (MeOH, 99.5%), N,N-dimethylformamide (DMF, 99.5%), 2-methylimidazole(2-mim, 98%), Caesium bromide (CsBr, 99.5%) and lead bromide (PbBr<sub>2</sub>, 99.9%) were purchased from Macklin. Zinc nitrate hexahydrate (Zn(NO<sub>3</sub>)<sub>2</sub> • 6H<sub>2</sub>O) was purchased from Alfa Aesar.

**Synthesis of ZIF-8.** Zn(NO<sub>3</sub>)<sub>2</sub>•6H<sub>2</sub>O (1.78 g, 6 mmol) and 2-mim (0.49 g, 6 mmol) were dissolved in DMF (130 mL). A Teflon-lined stainless-steel autoclave (150 mL) was used as reaction vessel to load mixture. After that, we put it into a programmable oven and heated at a rate of 5 °C min<sup>-1</sup> to 140 °C for 24 hours, then followed by cooling naturally to room temperature. After washing three times with DMF, the upper clear layer was washed three times with methanol, the white ZIF-8 crystallites were dried at 80 °C overnight.

**Synthesis of CsPbBr<sub>3</sub>@ZIF-8.** ZIF-8 powder (0.50 g) and CsBr (4.24 g, 20 mmol) were dissolved in MeOH (20 mL) and transferred in the autoclave, the mixture was then stirred at 60 °C for 12 hours to ensure that CsBr was immersed into the cages of ZIF-8. The CsBr@ZIF-8 powder was obtained after washing three times with methanol and dried at 80 °C overnight. CsBr@ZIF-8 (0.50 g) and PbBr<sub>2</sub> (0.36 g, 1 mmol) were put in an agate mortar and grinded for 20 minutes and washed with DMF for three times, then the CsPbBr<sub>3</sub>@ZIF-8 powders were obtained.

**Synthesis of CsPbBr<sub>3</sub>.** With the similar method of CsPbBr<sub>3</sub>@ZIF-8, CsBr (0.21 g, 1 mmol) and PbBr<sub>2</sub> (0.36 g, 1 mmol) were put in an agate mortar and grinded for 20 minutes and the CsPbBr<sub>3</sub> powders were obtained.

## 1.2 Characterization

SEM images, EDS and SEM mapping were obtained using a JSM-6700F. TEM, HRTEM images and HRTEM mapping were obtained using a Talos F200X. XRD patterns were obtained using a SmartLab 9KW. The thermogravimetric analysis was using a TGA5500. XPS spectra was obtained using Thermo Fisher ESCALAB XI+. The PL spectra were obtained using a FluoroMax-4. UV absorption spectra were obtained using a ChirascanV100. B&H SPC-150N TCSPC module was utilized for fluorescence lifetime measurement.

## 1.3 Multiphoton excitation photoluminescence.

The system consisted of a femtosecond laser (CARBIDE-CB5, Light Conversion Ltd.) and an optical parametric amplification (OPA, Orpheus and Lyra, Light Conversion Ltd.) as the laser source. The emitted laser pulses have a repetition frequency of 60 kHz, wavelength range from 300 to 2600 nm and pulse width of ~216 fs. The laser output beam was divided into two paths by a beam splitter, one path was detected by a power meter as the reference and another path directly entered the microscope (Nikon, ECLIPSE Ti2). In the microscope, the laser was reflected by a dichroic mirror (Thorlabs DMSP950R) and then focused on the sample on X-Y stage by a 20× objective lens (Nikon, NA = 0.45). The fluorescence generated by the sample was collected through the objective lens, and then passing through the dichroic mirror to the bottommost mirror. The reflected fluorescence was focused by a lens, and filtered by a suitable filter (Thorlabs

FESH0750). Finally, the fluorescence signal was collected by the optical fiber, which waveguided it to the detector of a spectrometer (QE Pro, Ocean Optics Ltd.).

## 2. Analysis results

### 2.1 Determination of molar concentrations of pure CsPbBr<sub>3</sub>

The concentration of pure CsPbBr<sub>3</sub> was determined with the same way as previous reports, which is  $C_{\text{pure}} = (m_{\text{pure}}/M_{\text{pure}}) (V_{\text{u}}/V)(1/V_{\text{s}})$ ,<sup>S1, S2</sup> where  $C_{\text{pure}}$ ,  $m_{\text{pure}}$  and  $M_{\text{pure}}$ , and  $V_{\text{s}}$  represents the molar concentration, weight, molar mass, and volume of pure CsPbBr<sub>3</sub>, respectively,  $V_{\text{u}}$  represents the unit cell volume of CsPbBr<sub>3</sub> and  $V$  represents the particle volume. Since the substances used were the same, we approximated that the molar concentration ratio be the density ratio. We weighed 350  $\mu\text{L}$  of CsPbBr<sub>3</sub> to obtain a mass of 0.77 g. Substituting the values and comparing with the data in the previous articles result in  $C_{\text{pure}} = 9.3 \times 10^{-4}$  mol/L.

### 2.2 Determination of molar concentrations of CsPbBr<sub>3</sub> QDs in ZIF-8

The molar concentration of the CsPbBr<sub>3</sub> QDs encapsulated in ZIF-8 was determined from the results of element mapping. Because Cs<sup>+</sup> was added first, and then, Pb<sup>2+</sup> was added during the reaction, there was inevitably an excess of unreacted Cs<sup>+</sup>. We assumed that all Pb<sup>2+</sup> were derived from the CsPbBr<sub>3</sub> QDs and all Zn<sup>2+</sup> were derived from the ZIF-8. Therefore, the ration of the number of CsPbBr<sub>3</sub> QD and the numbers of ZIF-8 was  $n_{\text{pb}}/n_{\text{zn}}$ . According to the CIF files, we obtained the unit cell volume of ZIF-8 ( $V_{\text{ZIF}}$ ) of 4.905 nm<sup>3</sup> and the unit cell volume of ZIF-8 ( $V_{\text{UCsPbBr}_3}$ ) of 0.805 nm<sup>3</sup>. From the HRTEM and TEM images, the shape of CsPbBr<sub>3</sub> can be approximated as a cube and its average length was about 12 nm, and the volume ( $V_{\text{CsPbBr}_3}$ ) could

be calculated from this. As such, the molar concentration of the CsPbBr<sub>3</sub>@ZIF-8 was calculated to be  $C_{\text{CsPbBr}_3@ZIF-8} = (n_{\text{Pb}} / n_{\text{Zn}}) * (V_{\text{u CsPbBr}_3} / V_{\text{CsPbBr}_3}) * [1 / (N_{\text{A}} * V_{\text{ZIF}})] = (8.51 \pm 1.35) \times 10^{-6} \text{ mol/L}$ .

S1, S2

### 2.3 Multiphoton excited photonluminescence (MPEPL) signal

The MEPL signal formula for 2,3,4, or 5 photon absorption (MPA) can be obtained as:

$$F_2 = \iiint \Delta f_2 = \alpha \frac{\pi^{3/2}}{8\sqrt{2}(\hbar\omega)^2} \tau \phi \eta \sigma_2 \rho L_0 w_0^2 I_{00}^2$$

$$F_3 = \iiint \Delta f_3 = \alpha \frac{\pi^{3/2}}{18\sqrt{3}(\hbar\omega)^3} \tau \phi \eta \sigma_3 \rho L_0 w_0^2 I_{00}^3$$

$$F_4 = \iiint \Delta f_4 = \alpha \frac{\pi^{3/2}}{64(\hbar\omega)^4} \tau \phi \eta \sigma_4 \rho L_0 w_0^2 I_{00}^4$$

$$F_5 = \iiint \Delta f_5 = \alpha \frac{\pi^{3/2}}{50\sqrt{5}(\hbar\omega)^5} \tau \phi \eta \sigma_5 \rho L_0 w_0^2 I_{00}^5$$

In these equations,  $F_n$  is the *MPA-PL* strength collected by spectrometer,  $n$  counts for the fact that  $n$  photons are absorbed;  $\alpha$  is the proportion of signal propagate into the collection system;  $\hbar\omega$  is the photon energy of the incident laser beam;  $\tau$  is pulse duration of the Gaussian laser pulse;  $\phi$  is the efficiency of collection system;  $\eta$  is the PL quantum yield;  $\sigma_n$  is the  $n$ -photon-absorption cross-section; the product of  $\eta$  and  $\sigma_n$  is multi-photon action cross-section;  $\rho$  is the sample molar concentration;  $L_0$  is the effective length of sample;  $w_0$  is the beam waist of laser beam at the focal point;  $I_{00}$  is peak intensity of the input pulse at the focus.

To calculate the  $\eta\sigma_n$  from the experimental data, we need to firstly obtain the other parameters in the above equations. Here, we set the effective length of sample  $L_0 = 2Z_0$ , in which  $Z_0$  is the Raleigh length of the objective lens. As above mentioned, the molar concentration of the CsPbBr<sub>3</sub>@ZIF-8 can be expressed to be  $(8.51 \pm 1.35) \times 10^{-6}$  mol/L and the molar concentration of the CsPbBr<sub>3</sub> can be expressed to be  $9.3 \times 10^{-4}$  mol/L. The multiphoton excitation fluorescence ratio method was used to determine the multiphoton absorption cross-section of the sample. Firstly, the two-photon absorption coefficient of pure chalcogenide in the 1000 nm band can be found from the literature as 5 cm/GW.<sup>53</sup> Then, according to the equation:  $\sigma_n = (\hbar\omega)^{n-1} a_n / (2nN_0d_0)$ .<sup>54</sup> In the equation,  $\hbar\omega$  is the photon energy of the incident laser beam;  $a_n$  is the multiphoton absorption coefficient;  $N_0$  and  $d_0$  represent the Avogadro constant and the molar concentration of the sample, respectively. We calculate the two-photon action cross-section  $\eta\sigma_2$  of CsPbBr<sub>3</sub> to be  $2.7 \times 10^4$  GM. In the calculation process, the fluorescence quantum yield was taken as 60%. The beam waist radius  $w_0$  is proportional to the incident wavelength with  $w_0 \approx 0.61\lambda / NA$ . The actual beam waist radius  $w_0$  can be measured as 3  $\mu$ m, 3.9  $\mu$ m, 5.4  $\mu$ m and 6.6  $\mu$ m for the laser beam spots at 1000 nm, 1300 nm, 1800 nm and 2200 nm, respectively.

By selection of CsPbBr<sub>3</sub> as reference material, according to the equation:

$$\eta\sigma_{2MOF} = \frac{F_{2MOF} \cdot \eta\sigma_2(\rho I_{00}^2)_{Pure}}{F_2 \cdot (\rho I_{00}^2)_{MOF}},$$

we calculated the two-photon action cross-section  $\eta\sigma_2$  of CsPbBr<sub>3</sub>@ZIF-8 to be  $(14 \pm 3) \times 10^6$  GM. As for the determination of multiphoton action cross-sections corresponding to the 1300, 1800, and 2200 nm bands, we compared their MPA-PL signals to the 2MPA-PL signal and employed the above equations to infer the MPA action cross-sections.

## 2.4 Third harmonic generation (THG) signal

We observed the THG of CsPbBr<sub>3</sub> and CsPbBr<sub>3</sub>@ZIF-8 at 1800 nm and 2200 nm, respectively. We found that their THG signals are almost the same at the same incident intensity, regardless of 1800 nm or 2200 nm. A filter was used in the spectrometer collection to filter out the fluorescence signal. The THG signals from CsPbBr<sub>3</sub>, CsPbBr<sub>3</sub>@ZIF-8, or,  $\alpha$ -quartz powders were measured under the same experimental conditions. We used  $\alpha$ -quartz powders as a standard sample, since its  $\chi^{(3)}$  values are documented in the literature.

$$F_3 \propto |\chi^{(3)}|^2 I_\omega^3 L^2 \frac{\sin^2(\Delta k_q L_q/2)}{(\Delta k_q L_q/2)^2}, \text{ where}$$

The intensity of the THG signal intensity is approximated as:  $\chi^{(3)}$  is the third-order polarizability of the sample,  $\Delta k_q$  is the wavenumber difference between the THG of the sample and the excitation light, and  $L_q$  represents the thickness of the sample. By comparing the THG signal from CsPbBr<sub>3</sub>, or, CsPbBr<sub>3</sub>@ZIF-8 to  $\alpha$ -quartz, their  $\chi^{(3)}$  were determined.

The  $\chi^{(3)}$  of  $\alpha$ -quartz reported in many literatures with an average value of  $\chi^{(3)} = 2.6 \times 10^{-14}$  esu.<sup>55</sup> At 1800 nm, the third-order nonlinear polarizability  $\chi^{(3)}$  of CsPbBr<sub>3</sub> and CsPbBr<sub>3</sub>@ZIF-8 was then determined to be  $5.14 \times 10^{-12}$  esu and  $8.08 \times 10^{-12}$  esu, respectively, while, at 2200 nm, the  $\chi^{(3)}$  value of CsPbBr<sub>3</sub> and CsPbBr<sub>3</sub>@ ZIF-8 was  $7.43 \times 10^{-12}$  esu and  $2.02 \times 10^{-11}$  esu, respectively, see Fig. S5.

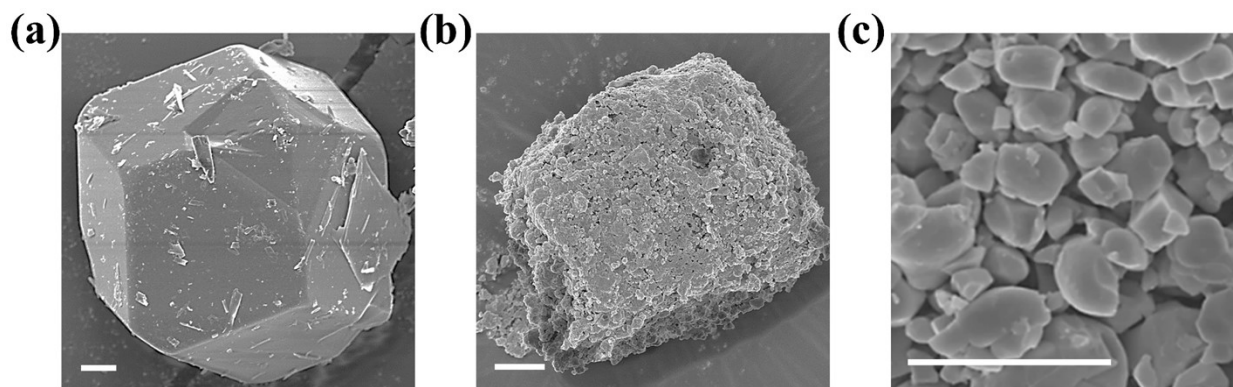

**Fig. S1** The SEM of (a) ZIF-8 with scale bar of 2  $\mu\text{m}$ ,  
 (b)  $\text{CsPbBr}_3$ @ZIF-8 and (c)  $\text{CsPbBr}_3$  with scale bar of 5  $\mu\text{m}$ .

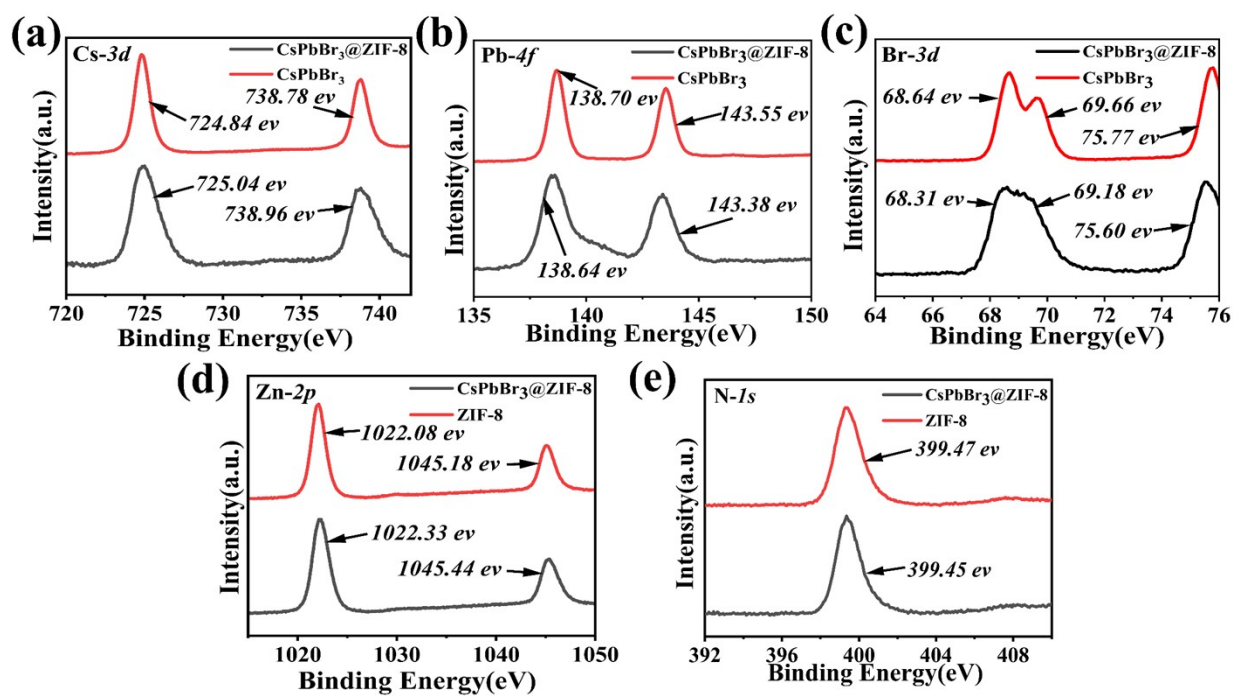

**Fig. S2** The high resolution X-ray photoelectron spectra (XPS) of



(a) Cs-3d, (b) Pb-4f, (c) Br-3d, (d) Zn-2p and (e) N-1s.

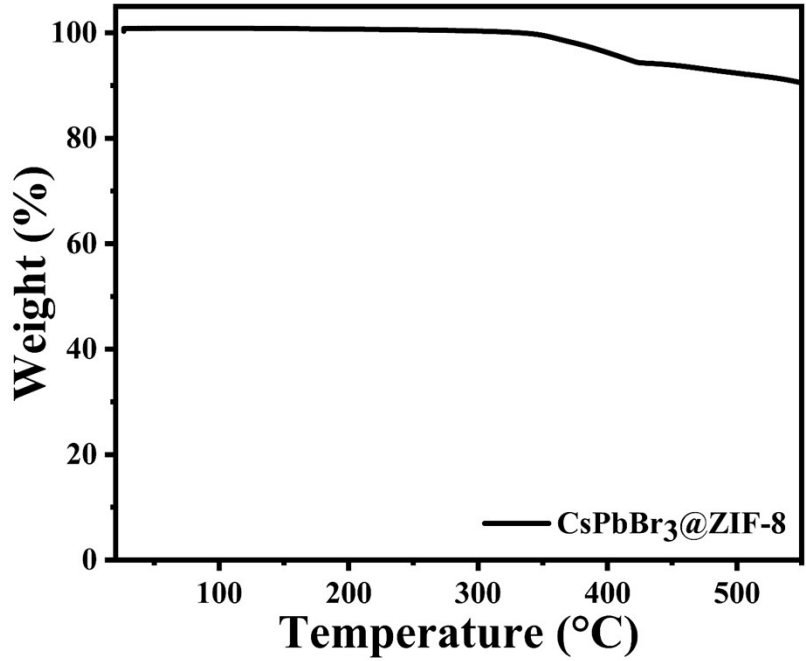

Fig. S3 The thermogravimetric analysis of CsPbBr<sub>3</sub>@ZIF-8.

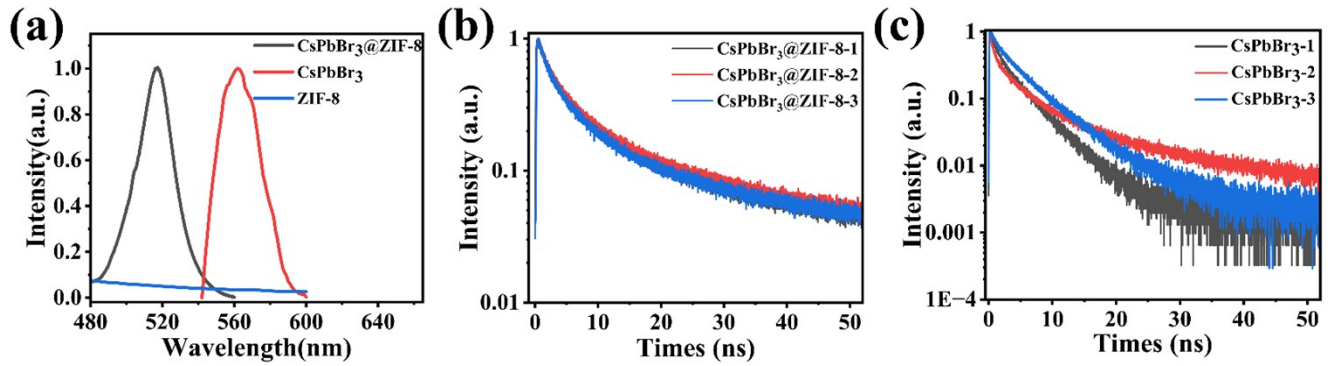

Fig. S4 (a) The photoluminescence (PL) spectra of CsPbBr<sub>3</sub>@ZIF-8, CsPbBr<sub>3</sub>, and ZIF-8. The PL decay plots of (b) CsPbBr<sub>3</sub>@ZIF-8 and (c) CsPbBr<sub>3</sub> at 405 nm.

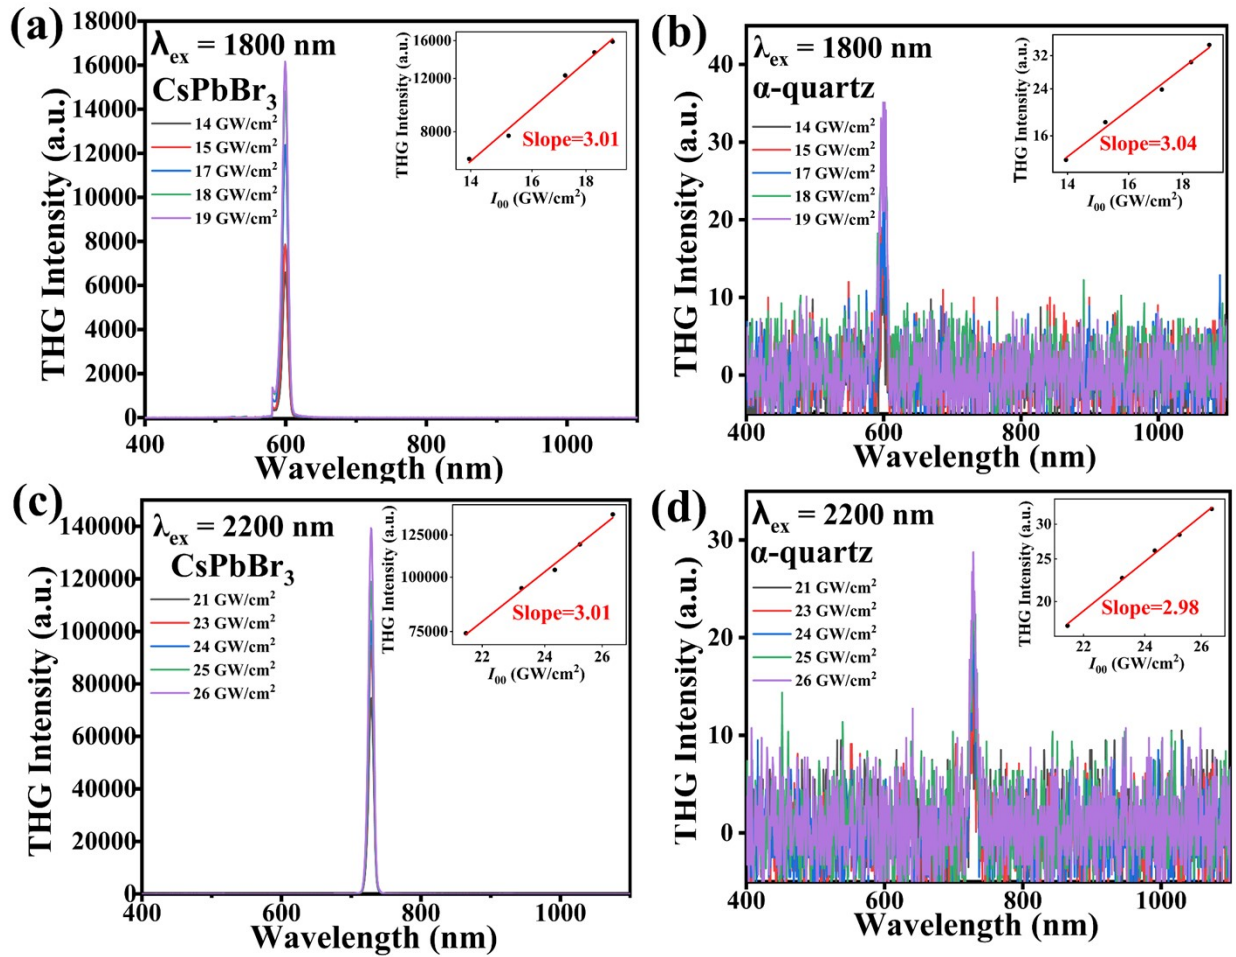

**Fig. S5** Comparison of THG of CsPbBr<sub>3</sub> (a. At 1800nm, c. At 2200nm) and  $\alpha$ -quartz (b. At 1800nm, d. At 2200nm).

## References

- S1. H. Wu, L. Yao, W. Cao, Y. Yang, Y. Cui, D. Yang and G. Qian, *J. Mater. Chem. C*, 2022, **10**, 5550-5558.
- S2. H. He, Y. Cui, B. Li, B. Wang, C. Jin, J. Yu, L. Yao, Y. Yang, B. Chen and G. Qian, *Adv. Mater.*, 2019, **31**, 1806897.
- S3. F. O. Saouma, C. C. Stoumpos, M. G. Kanatzidis, Y. S. Kim and J. I. Jang, *J. Phys. Chem. Lett.*, 2017, **8**, 4912-4917.
- S4. F. Zhou, X. Ran, D. Fan, S. Lu and W. Ji, *Adv. Opt. Mater.*, 2021, **9**, 2100292.
- S5. M. Liu, H. S. Quah, S. Wen, Z. Yu, J. J. Vittal and W. Ji, *Chem. Mater.*, 2016, **28**, 3385-3390.
